# Supplementary figures and images for: Injecting structure-aware insights for the learning of RNA sequence representations to identify m6A modification sites
Source: PeerJ journal article supplement (doi:10.7717/peerj.18878), 2025-02-24

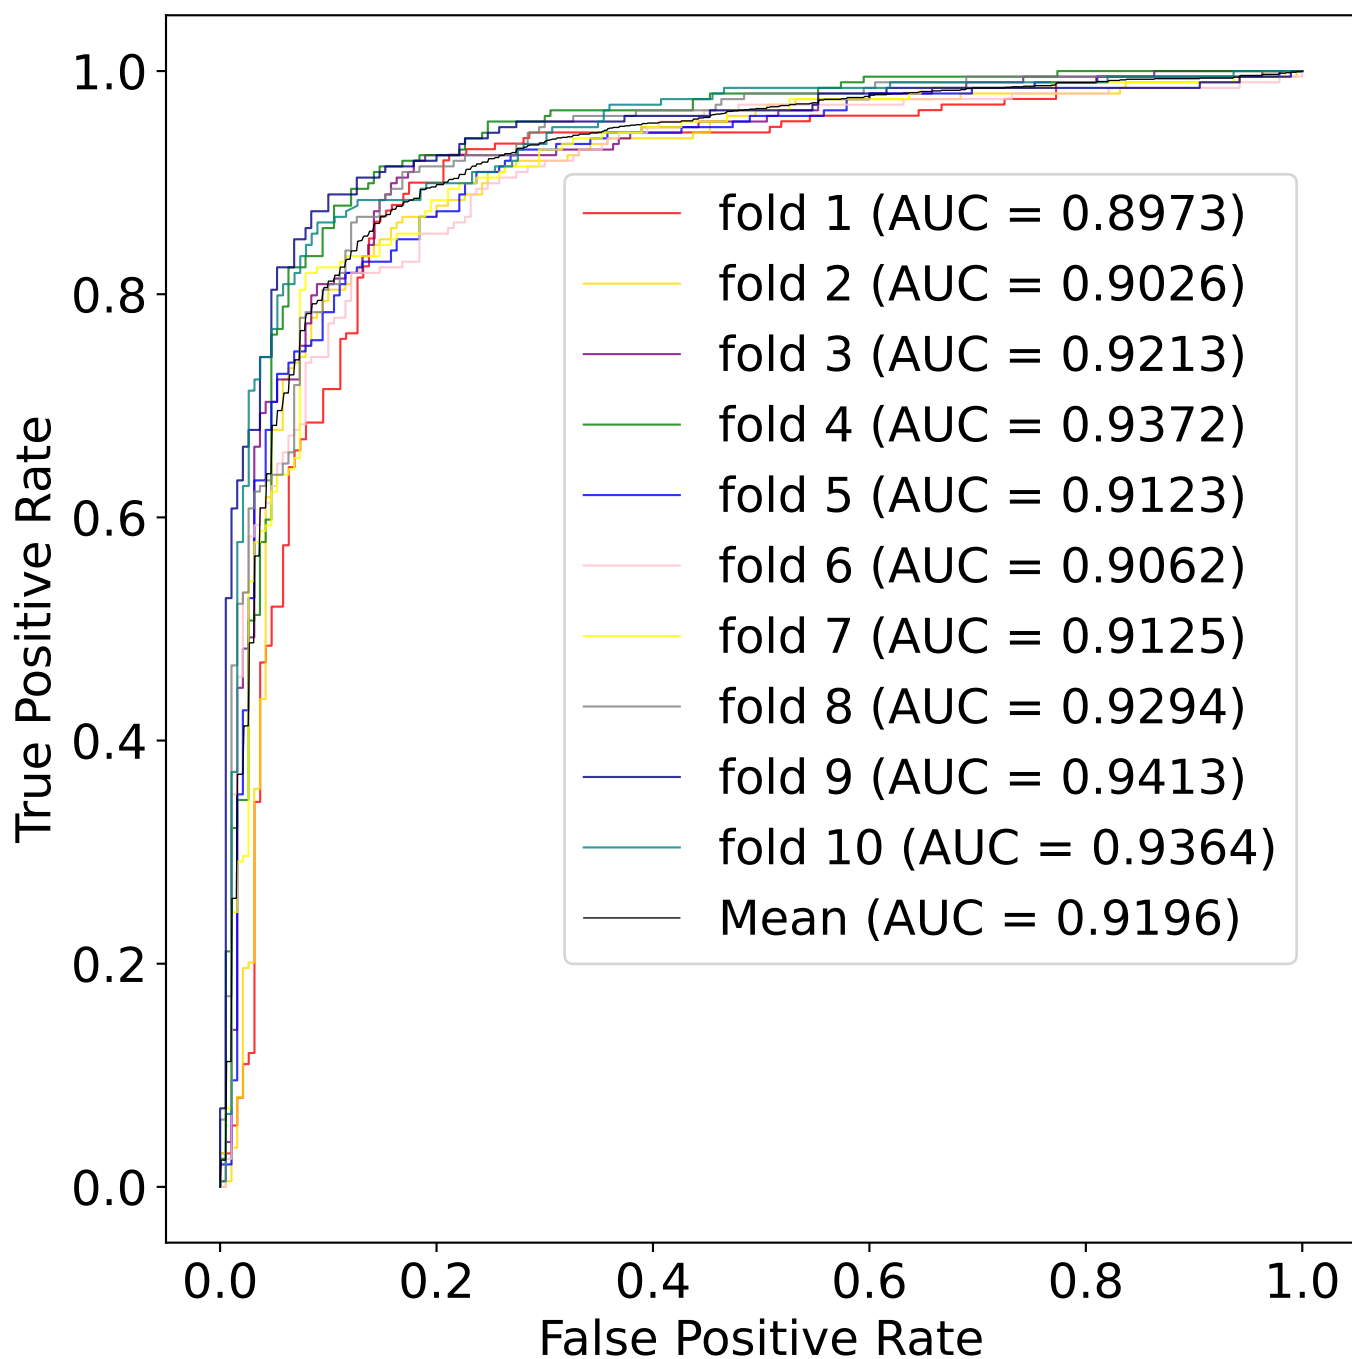

Supplement: data.zip [file 5fold-manner.pdf › code/code/5fold-manner.pdf]

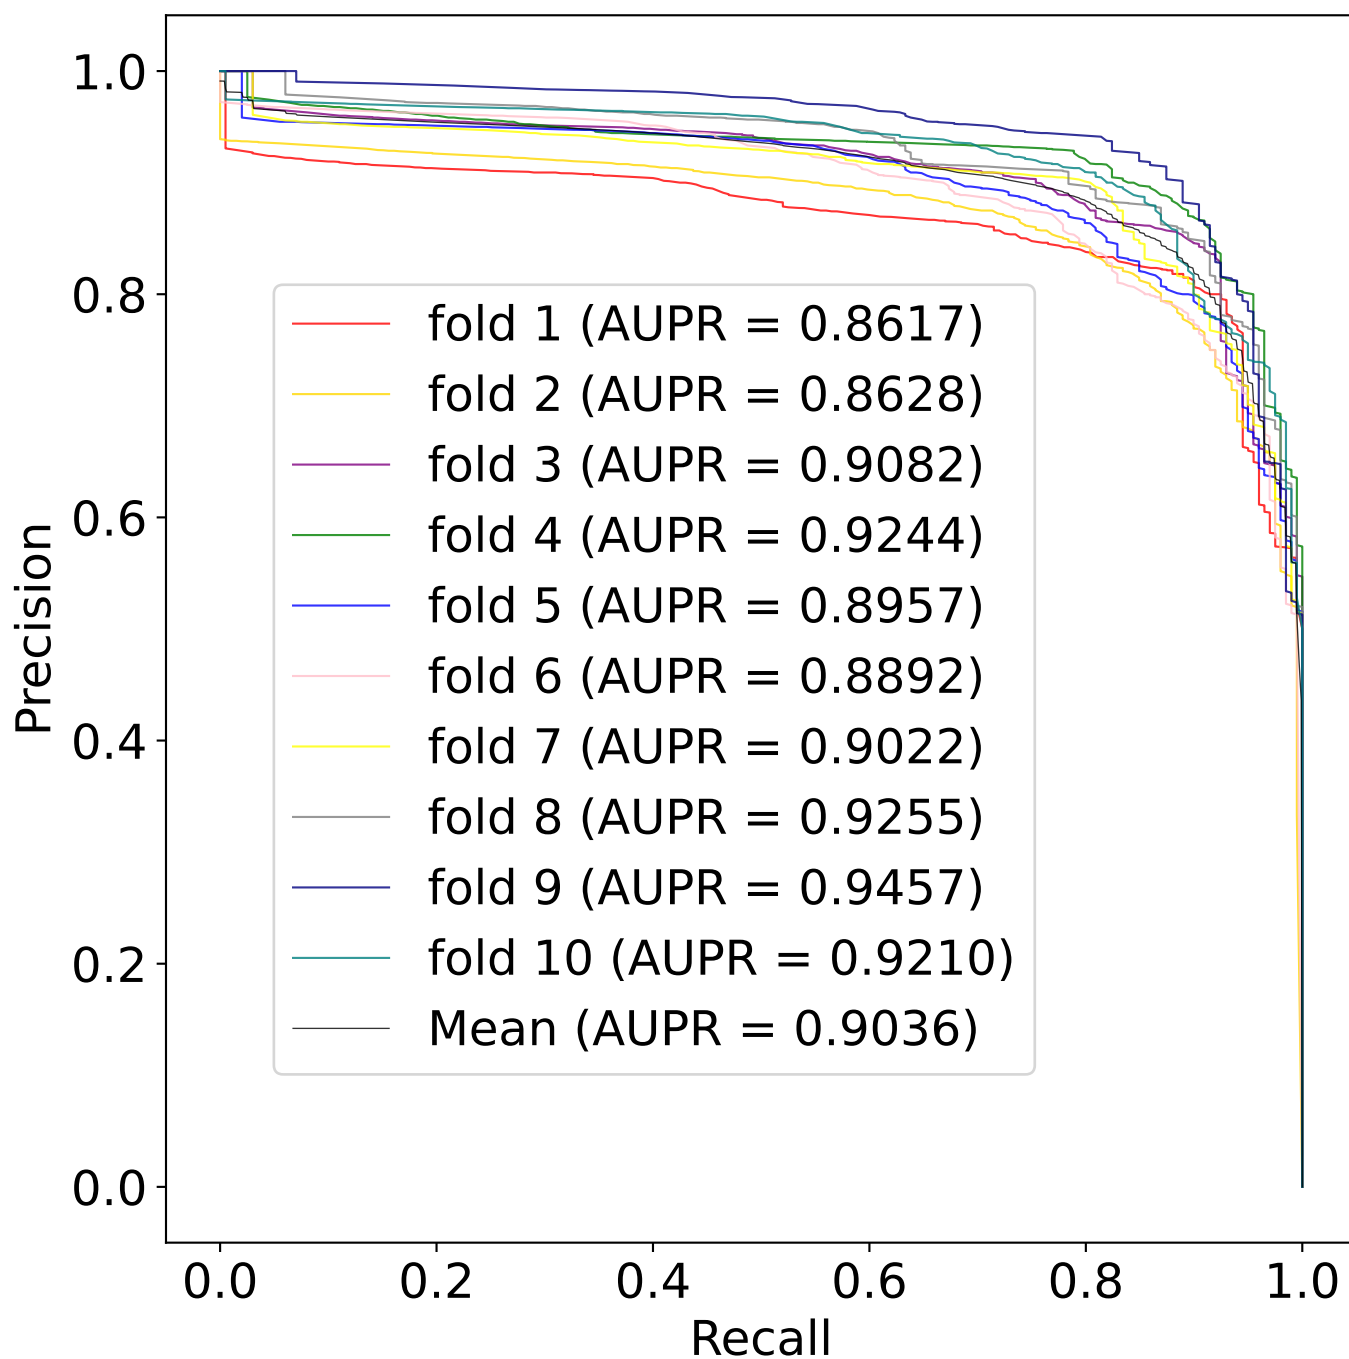

Supplement: data.zip [file PR-5fold.pdf › code/code/PR-5fold.pdf]
